# Supplementary material
Source: PubMed Central journal article supplement (PMC8179339)
Supplement: kwaa026_elovainio_web_material_final.pdf [file kwaa026_elovainio_web_material_final.pdf]

# **The Contribution of Neighborhood Socioeconomic Disadvantage to Depressive Symptoms Over the Course of Adult Life: A 32-Year Prospective Cohort Study**

Marko Elovainio, Jussi Vahtera, Jaana Pentti, Christian Hakulinen, Laura Pulkki-Råback, Jari Lipsanen, Marianna Virtanen, Liisa Keltikangas-Järvinen, Mika Kivimäki, Mika Kähönen, Jorma Viikari, Terho Lehtimäki, and Olli Raitakari

## **Table of Contents**

Web Appendix. Justification of and cutoff points for childhood psychosocial risk factors

Web Table 1. Childhood risk categories and their components

Web Table 2. Association between childhood neighborhood disadvantage (continuous score) and development of depressive symptoms according to follow-up time. Mixed-effects models adjusted for age, sex, and area deprivation during the last 5 years.

Web Table 3. Association between childhood neighborhood disadvantage and development of depressive symptoms according to follow-up time. Mixed-effects models using inverse probability of censoring weights for missingness with 20-year follow-up. Adjusted for age, sex, childhood psychosocial risk factors, and area disadvantage during the last 5 years.

Web Table 4. Association between childhood neighborhood disadvantage and development of depressive symptoms according to follow-up time. Mixed-effects models adjusted for age, sex, and continuous childhood psychosocial risk score.

## **WEB APPENDIX**

### **Justification of and Cutoff Points for Childhood Psychosocial Risk Factors**

We hypothesized that each of the separate risk domain clusters, particularly the accumulation of risk across domains during childhood and adolescence, would be associated with a higher risk of depressive symptoms and a more rapid progression of depressive symptom severity in adulthood. We used the approach suggested by Evans et al. (17). First we formed domain-specific risk clusters by combining overlapping risk factors into summary scores. Second, we summed the dichotomous domain-specific risk factor summary scores into a cumulative measure across all domains.

**Web Table 1.** Childhood risk categories and their components

| Risk Cluster Category and Component    | Measure/Scale                                                              |
|----------------------------------------|----------------------------------------------------------------------------|
| <b>Socioeconomic risk cluster</b>      |                                                                            |
| Low occupational status                | Manual occupation (both parents)                                           |
| Low educational level                  | Comprehensive school (both parents)                                        |
| Low family income                      | Annual income in lowest quartile                                           |
| Unsteady employment history            | Unemployment, long-term sick leave, disability pension (either of parents) |
| <b>Psycho-emotional risk factors</b>   |                                                                            |
| Parental mental health status          | Any diagnosis of mental disorder                                           |
| Child-rearing style                    | The nurturance scale (negative response, i.e., 4 or 5 in any item)         |
| Low life satisfaction                  | The dissatisfaction scale (negative response, i.e., 4 or 5 in any item)    |
| Heavy alcohol use                      | Heavy intoxication (>6 units) weekly                                       |
| <b>Stressful life-events</b>           |                                                                            |
| Moving home                            | Change of residence at least three times                                   |
| Change of school                       | Change of school at least one time                                         |
| Divorce                                | Parental divorce or separation                                             |
| Death of significant person            | Death of a family member/close person                                      |
| Hospitalization and/or serious illness | Long-term hospitalization (>2 weeks) or serious disease in the family      |
| <b>Parental lifestyle</b>              |                                                                            |
| Excess energy intake (mother)          | Body mass index $\geq 30.0$                                                |
| Excess energy intake (father)          | Body mass index $\geq 30.0$                                                |
| Smoking (mother)                       | Daily smoking                                                              |
| Smoking (father)                       | Daily smoking                                                              |
| Physical inactivity (mother)           | <3 times a week                                                            |
| Physical inactivity (father)           | <3 times a week                                                            |

**Web Table 2. Association between childhood neighborhood disadvantage (continuous score) and development of depressive symptoms according to follow-up time. Mixed-effects models adjusted for age, sex, and area deprivation during the last 5 years.**

| <i>Predictor</i>                                     | <b>Five-year follow-up</b> |                  | <b>Ten-year follow-up</b> |                  | <b>Fifteen-year follow-up</b> |                  | <b>Twenty-year follow-up</b> |                  |
|------------------------------------------------------|----------------------------|------------------|---------------------------|------------------|-------------------------------|------------------|------------------------------|------------------|
|                                                      | <i>Estimate</i>            | <i>P Value</i>   | <i>Estimate</i>           | <i>P Value</i>   | <i>Estimate</i>               | <i>P Value</i>   | <i>Estimate</i>              | <i>P Value</i>   |
| Intercept                                            | 2.37<br>(2.28 – 2.47)      | <b>&lt;0.001</b> | 2.43<br>(2.36 – 2.51)     | <b>&lt;0.001</b> | 2.39<br>(2.33 – 2.45)         | <b>&lt;0.001</b> | 2.36<br>(2.31 – 2.41)        | <b>&lt;0.001</b> |
| Area deprivation during childhood                    | 0.05<br>(0.01 – 0.08)      | <b>0.006</b>     | 0.06<br>(0.02 – 0.09)     | <b>0.001</b>     | 0.06<br>(0.02 – 0.09)         | <b>0.001</b>     | 0.05<br>(0.02 – 0.09)        | <b>0.001</b>     |
| Age                                                  | -0.01<br>(-0.01 – -0.00)   | <b>0.002</b>     | -0.01<br>(-0.01 – -0.01)  | <b>&lt;0.001</b> | -0.01<br>(-0.01 – -0.01)      | <b>&lt;0.001</b> | -0.01<br>(-0.01 – -0.01)     | <b>&lt;0.001</b> |
| Male sex                                             | -0.19<br>(-0.24 – -0.14)   | <b>&lt;0.001</b> | -0.19<br>(-0.23 – -0.14)  | <b>&lt;0.001</b> | -0.17<br>(-0.21 – -0.12)      | <b>&lt;0.001</b> | -0.15<br>(-0.19 – -0.10)     | <b>&lt;0.001</b> |
| <b>Random Effects</b>                                |                            |                  |                           |                  |                               |                  |                              |                  |
| $\sigma^2$                                           | 0.16                       |                  | 0.17                      |                  | 0.18                          |                  | 0.18                         |                  |
| $\tau_{00}$                                          | 0.24 <sub>tau00</sub>      |                  | 0.24 <sub>tau00</sub>     |                  | 0.25 <sub>tau00</sub>         |                  | 0.25 <sub>tau00</sub>        |                  |
| ICC                                                  | 0.61                       |                  | 0.59                      |                  | 0.58                          |                  | 0.58                         |                  |
| N                                                    | 2143 <sub>tau00</sub>      |                  | 2310 <sub>tau00</sub>     |                  | 2386 <sub>tau00</sub>         |                  | 2411 <sub>tau00</sub>        |                  |
| Observations                                         | 3423                       |                  | 5010                      |                  | 6570                          |                  | 7897                         |                  |
| Marginal R <sup>2</sup> / Conditional R <sup>2</sup> | 0.027 / 0.618              |                  | 0.030 / 0.599             |                  | 0.026 / 0.591                 |                  | 0.022 / 0.590                |                  |

**Web Table 3. Association between childhood neighborhood disadvantage and development of depressive symptoms according to follow-up time. Mixed-effects models using inverse probability of censoring weights for missingness with 20-year follow-up. Adjusted for age, sex, childhood psychosocial risk factors, and area disadvantage during the last 5 years.**

|                                                      | <i>Estimate<br/>(95% CI)</i> | <i>P Value</i>   | <i>Estimate<br/>(95% CI)</i> | <i>P Value</i>   | <i>Estimate<br/>(95% CI)</i> | <i>P Value</i>   |
|------------------------------------------------------|------------------------------|------------------|------------------------------|------------------|------------------------------|------------------|
| Neighborhood disadvantage during childhood           | 0.07<br>(0.01 to 0.12)       | <b>0.016</b>     | 0.06<br>(0.00 to 0.11)       | <b>0.039</b>     | 0.05<br>(-0.00 to 0.11)      | 0.053            |
| Age                                                  | -0.01<br>(-0.01 to -0.00)    | <b>&lt;0.001</b> | -0.01<br>(-0.01 to -0.00)    | <b>&lt;0.001</b> | -0.01<br>(-0.01 to -0.00)    | <b>&lt;0.001</b> |
| Sex (male)                                           | -0.15<br>(-0.20 to -0.11)    | <b>&lt;0.001</b> | -0.15<br>(-0.21 to -0.10)    | <b>&lt;0.001</b> | -0.15<br>(-0.20 to -0.10)    | <b>&lt;0.001</b> |
| Childhood psychosocial risk factors                  |                              |                  | 0.06<br>(0.02 to 0.10)       | <b>0.002</b>     |                              |                  |
| Neighborhood disadvantage during last 5 years        |                              |                  |                              |                  | 0.03<br>(0.00 to 0.05)       | <b>0.021</b>     |
| <b>Random Effects</b>                                |                              |                  |                              |                  |                              |                  |
| $\sigma^2$                                           | 0.19                         |                  | 0.19                         |                  | 0.19                         |                  |
| $\tau_{00}$                                          | 0.24                         |                  | 0.24                         |                  | 0.24                         |                  |
| ICC                                                  | 0.56                         |                  | 0.56                         |                  | 0.56                         |                  |
| N                                                    | 1710                         |                  | 1710                         |                  | 1710                         |                  |
| Observations                                         | 5448                         |                  | 5448                         |                  | 5448                         |                  |
| Marginal R <sup>2</sup> / Conditional R <sup>2</sup> | 0.021 / 0.573                |                  | 0.024 / 0.573                |                  | 0.021 / 0.571                |                  |

**Web Table 4. Association between childhood neighborhood disadvantage and development of depressive symptoms according to follow-up time. Mixed-effects models adjusted for age, sex, and continuous childhood psychosocial risk score.**

| <i>Predictor</i>                                     | <b>Five-year follow-up</b> |                  | <b>Ten-year follow-up</b> |                  | <b>Fifteen-year follow-up</b> |                  | <b>Twenty-year follow-up</b> |                  |
|------------------------------------------------------|----------------------------|------------------|---------------------------|------------------|-------------------------------|------------------|------------------------------|------------------|
|                                                      | <i>Estimate</i>            | <i>P Value</i>   | <i>Estimate</i>           | <i>P Value</i>   | <i>Estimate</i>               | <i>P Value</i>   | <i>Estimate</i>              | <i>P Value</i>   |
| Area deprivation during childhood                    | 0.05<br>(-0.01 to 0.11)    | 0.100            | 0.06<br>(0.00 to 0.11)    | <b>0.049</b>     | 0.06<br>(0.01 to 0.12)        | <b>0.026</b>     | 0.06<br>(0.00 to 0.11)       | <b>0.044</b>     |
| Age                                                  | -0.01<br>(-0.01 to -0.00)  | <b>&lt;0.001</b> | -0.01<br>(-0.01 to -0.01) | <b>&lt;0.001</b> | -0.01<br>(-0.01 to -0.01)     | <b>&lt;0.001</b> | -0.01<br>(-0.01 to -0.01)    | <b>&lt;0.001</b> |
| Male sex                                             | -0.19<br>(-0.25 to -0.13)  | <b>&lt;0.001</b> | -0.19<br>(-0.25 to -0.14) | <b>&lt;0.001</b> | -0.17<br>(-0.23 to -0.12)     | <b>&lt;0.001</b> | -0.15<br>(-0.21 to -0.10)    | <b>&lt;0.001</b> |
| Childhood psychosocial risk factors                  | 0.05<br>(0.02 to 0.08)     | <b>0.001</b>     | 0.05<br>(0.02 to 0.08)    | <b>&lt;0.001</b> | 0.05<br>(0.02 to 0.07)        | <b>0.001</b>     | 0.05<br>(0.02 to 0.07)       | <b>0.001</b>     |
| <b>Random Effects</b>                                |                            |                  |                           |                  |                               |                  |                              |                  |
| $\sigma^2$                                           | 0.16                       |                  | 0.17                      |                  | 0.18                          |                  | 0.18                         |                  |
| $\tau_{00}$                                          | 0.23                       |                  | 0.23                      |                  | 0.23                          |                  | 0.24                         |                  |
| ICC                                                  | 0.59                       |                  | 0.57                      |                  | 0.57                          |                  | 0.57                         |                  |
| N                                                    | 1553                       |                  | 1660                      |                  | 1711                          |                  | 1728                         |                  |
| Observations                                         | 2481                       |                  | 3623                      |                  | 4748                          |                  | 5712                         |                  |
| Marginal R <sup>2</sup> / Conditional R <sup>2</sup> | 0.034 / 0.603              |                  | 0.038 / 0.590             |                  | 0.030 / 0.585                 |                  | 0.026 / 0.580                |                  |
